# Supplementary material for: Short Term Caloric Restriction and Biofeedback Enhance Psychological Wellbeing and Reduce Overweight in Healthy Women
Source: MDPI journal article supplement (doi:10.3390/jpm11111096), 2021-10-26
Supplement: s1 [file s1]

| Parameters<br>Total (n, Mean $\pm$ SD)                                      | Group          | Visit 1<br>Mean $\pm$ SD       | n        | Visit 2<br>Mean $\pm$ SD      | n        |
|-----------------------------------------------------------------------------|----------------|--------------------------------|----------|-------------------------------|----------|
| <b>Serum Parameters</b>                                                     |                |                                |          |                               |          |
| <b>Adiponectin</b><br>V1 41, 11.7 $\pm$ 4.1<br>V2 41, 11.1 $\pm$ 4.1        | CR<br>CR + CPI | 12.2 + 4.8<br>11 + 3.1         | 21<br>20 | 11.9 + 5.3<br>10.4 + 2.4      | 20<br>21 |
| <b>Leptin</b><br>V1 41, 15.9 $\pm$ 10.7<br>V2 41, 9.5 $\pm$ 7.8             | CR<br>CR + CPI | 12 + 8.4<br>20 + 11.5          | 21<br>20 | 6.4 + 5.4<br>12.6 + 8.6       | 20<br>21 |
| <b>Secretagogin</b><br>V1 41, 151 $\pm$ 157.5<br>V2 41, 128.1 $\pm$ 133.1   | CR<br>CR + CPI | 174 + 175<br>126.9 + 137.1     | 21<br>20 | 143.4 + 144.4<br>113.5 + 123  | 20<br>21 |
| <b>Resistin</b><br>V1 41, 7.7 $\pm$ 3.4<br>V2 41, 7 $\pm$ 2.8               | CR<br>CR + CPI | 7.1 + 3.7<br>8.3 + 3           | 21<br>20 | 6.6 + 2.8<br>7.4 + 2.8        | 20<br>21 |
| <b>HDL Cholesterol</b><br>V1 43, 1.8 $\pm$ 0.4<br>V2 42, 1.6 $\pm$ 0.4      | CR<br>CR + CPI | 1.9 + 0.4<br>1.6 + 0.3         | 22<br>21 | 1.7 + 0.4<br>1.4 + 0.3        | 21<br>21 |
| <b>Total Cholesterol</b><br>V1 43, 5.6 $\pm$ 1.2<br>V2 42, 5.3 $\pm$ 1.4    | CR<br>CR + CPI | 5.7 + 1.1<br>5.4 + 1.2         | 22<br>21 | 5.4 + 1.5<br>5.2 + 1.3        | 21<br>21 |
| <b>proBNP</b><br>V1 43, 104.9 $\pm$ 142.2<br>V2 41, 82 $\pm$ 100.2          | CR<br>CR + CPI | 141.2 + 182.9<br>66.9 + 66.1   | 22<br>21 | 107.9 + 122.3<br>57.4 + 67.7  | 20<br>21 |
| <b>AP</b><br>V1 43, 67.3 $\pm$ 18.8<br>V2 41, 61.6 $\pm$ 17.7               | CR<br>CR + CPI | 65.8 + 17<br>68.9 + 20.8       | 22<br>21 | 60.2 + 16.8<br>63 + 18.8      | 20<br>21 |
| <b>GGT</b><br>V1 43, 21.2 $\pm$ 19.5<br>V2 41, 17.3 $\pm$ 14.1              | CR<br>CR + CPI | 17.4 + 8.1<br>25.2 + 26.7      | 22<br>21 | 14.3 + 6.6<br>20.1 + 18.5     | 20<br>21 |
| <b>BDNF</b><br>V1 41, 17977.9 $\pm$ 12006.9<br>V2 41, 17613.3 $\pm$ 12278.1 | CR<br>CR + CPI | 19898 + 12930<br>15960 + 10915 | 21<br>20 | 21939 + 14082<br>13492 + 8749 | 20<br>21 |
| <b>IL-6</b><br>V1 41, 2.9 $\pm$ 2<br>V2 40, 2.8 $\pm$ 1.5                   | CR<br>CR + CPI | 1.9 + 0.6<br>3.8 + 2.5         | 20<br>21 | 2.1 + 1<br>3.4 + 1.7          | 19<br>21 |
| <b>CRP</b><br>V1 43, 0.4 $\pm$ 0.4<br>V2 42, 0.4 $\pm$ 0.3                  | CR<br>CR + CPI | 0.23 + 0.23<br>0.5 + 0.5       | 22<br>21 | 0.29 + 0.3<br>0.45 + 0.36     | 21<br>21 |
| <b>Cortisol (Serum)</b><br>V1 43, 15.7 $\pm$ 4.8<br>V2 41, 15.7 $\pm$ 4.8   | CR<br>CR + CPI | 16.3 + 4.7<br>15.1 + 4.9       | 22<br>21 | 15.2 + 4.5<br>16.1 + 5.1      | 20<br>21 |
| <b>Cortisol (Sputum)</b><br>V1 43, 0.5 $\pm$ 0.3<br>V2 39, 0.4 $\pm$ 0.2    | CR<br>CR + CPI | 0.51 + 0.28<br>0.49 + 0.3      | 22<br>21 | 0.44 + 0.25<br>0.48 + 0.2     | 20<br>19 |
| <b>Physical Activity</b>                                                    |                |                                |          |                               |          |
|                                                                             | CR             | 50.9 + 23.4                    | 16       | /                             | /        |
|                                                                             | CR + CPI       | 36.3 + 12                      | 16       | /                             | /        |

| Parameters<br>Total (n, Mean $\pm$ SD)                                             | Group          | Visit 1<br>Mean $\pm$ SD             | n        | Visit 2<br>Mean $\pm$ SD             | n        |
|------------------------------------------------------------------------------------|----------------|--------------------------------------|----------|--------------------------------------|----------|
| <b>Anthropometric Parameters</b>                                                   |                |                                      |          |                                      |          |
| <b>BMI</b><br>V1 43, 27.6 $\pm$ 5.7<br>V2 43, 26.7 $\pm$ 5.6                       | CR<br>CR + CPI | 26.2 $\pm$ 4.2<br>29 $\pm$ 6.8       | 22<br>21 | 25.5 $\pm$ 4.2<br>27.9 $\pm$ 6.5     | 22<br>21 |
| <b>Waist Circumference</b><br>V1 43, 97.9 $\pm$ 14.2<br>V2 40, 94.7 $\pm$ 12.7     | CR<br>CR + CPI | 97.3 $\pm$ 12.3<br>98.6 $\pm$ 16.2   | 22<br>21 | 93.3 $\pm$ 9<br>96.1 $\pm$ 16.1      | 20<br>20 |
| <b>WHtR</b><br>V1 43, 1.7 $\pm$ 0.2<br>V2 42, 1.8 $\pm$ 0.2                        | CR<br>CR + CPI | 1.7 $\pm$ 0.2<br>1.7 $\pm$ 0.3       | 22<br>21 | 1.8 $\pm$ 0.2<br>1.8 $\pm$ 0.3       | 21<br>21 |
| <b>Bodyfat</b><br>V1 31, 27.7 $\pm$ 13.1<br>V2 23, 26.6 $\pm$ 12.2                 | CR<br>CR + CPI | 24.1 $\pm$ 10.6<br>31 $\pm$ 15.1     | 19<br>12 | 23.5 $\pm$ 11.8<br>26.5 $\pm$ 11.2   | 14<br>9  |
| <b>Lean Mass</b><br>V1 31, 47.7 $\pm$ 5.4<br>V2 24, 47 $\pm$ 4.7                   | CR<br>CR + CPI | 47 $\pm$ 4.4<br>48.6 $\pm$ 6.9       | 19<br>12 | 47 $\pm$ 4.17<br>46.8 $\pm$ 5.6      | 14<br>10 |
| <b>FLI</b><br>V1 43, 41.2 $\pm$ 28.9<br>V2 41, 35.3 $\pm$ 26.8                     | CR<br>CR + CPI | 32.8 $\pm$ 21.8<br>50 $\pm$ 33.2     | 22<br>21 | 27.3 $\pm$ 21.5<br>42.9 $\pm$ 29.5   | 20<br>21 |
| <b>Hormones</b>                                                                    |                |                                      |          |                                      |          |
| <b>Estradiol</b><br>V1 43, 49.6 $\pm$ 70.1<br>V2 41, 45.8 $\pm$ 83.3               | CR<br>CR + CPI | 54.2 $\pm$ 88.4<br>44.7 $\pm$ 45.4   | 22<br>21 | 33.8 $\pm$ 50.5<br>57.3 $\pm$ 105.6  | 20<br>21 |
| <b>Testosterone</b><br>V1 43, 0.22 $\pm$ 0.2<br>V2 41, 0.24 $\pm$ 0.2              | CR<br>CR + CPI | 0.17 $\pm$ 0.1<br>0.27 $\pm$ 0.2     | 22<br>21 | 0.18 $\pm$ 0.1<br>0.3 $\pm$ 0.2      | 20<br>21 |
| <b>FSH</b><br>V1 43, 51.3 $\pm$ 36.4<br>V2 41, 60.4 $\pm$ 43.7                     | CR<br>CR + CPI | 51.9 $\pm$ 33<br>50.7 $\pm$ 40.4     | 22<br>21 | 58.8 $\pm$ 40.7<br>61.9 $\pm$ 47.3   | 20<br>21 |
| <b>LH</b><br>V1 43, 29.6 $\pm$ 19.3<br>V2 41, 31 $\pm$ 19.8                        | CR<br>CR + CPI | 30 $\pm$ 17.3<br>29.3 $\pm$ 21.7     | 22<br>21 | 28.7 $\pm$ 17.5<br>33.2 $\pm$ 22     | 20<br>21 |
| <b>Biofeedback Parameters</b>                                                      |                |                                      |          |                                      |          |
| <b>HRV Baseline</b><br>V1 42, 13.3 $\pm$ 12.7<br>V2 38, 11.9 $\pm$ 8.5             | CR<br>CR + CPI | 17.1 $\pm$ 6.7<br>9.5 $\pm$ 4.9      | 21<br>21 | 13.9 $\pm$ 10.4<br>10.1 $\pm$ 6.1    | 18<br>20 |
| <b>HRV Stress</b><br>V1 42, 16.8 $\pm$ 12.9<br>V2 38, 14.3 $\pm$ 9.4               | CR<br>CR + CPI | 21.9 $\pm$ 16.1<br>11.6 $\pm$ 4.8    | 21<br>21 | 18.5 $\pm$ 11.4<br>10.6 $\pm$ 5      | 18<br>20 |
| <b>Systolic Blood Pressure</b><br>V1 42, 126.2 $\pm$ 18.8<br>V2 43, 119 $\pm$ 15.8 | CR<br>CR + CPI | 126.2 $\pm$ 20.2<br>126.3 $\pm$ 17.8 | 21<br>21 | 120.1 $\pm$ 11.5<br>117.7 $\pm$ 19.6 | 22<br>21 |
| <b>Diastolic Blood Pressure</b><br>V1 42, 84 $\pm$ 11.4<br>V2 43, 81.4 $\pm$ 11.6  | CR<br>CR + CPI | 83.5 $\pm$ 11.1<br>84.4 $\pm$ 11.9   | 21<br>21 | 81.7 $\pm$ 8.4<br>81 $\pm$ 14.5      | 22<br>21 |
|                                                                                    |                |                                      |          |                                      |          |

| Psychometric Parameters                                                  |          |             |    |             |    |
|--------------------------------------------------------------------------|----------|-------------|----|-------------|----|
| <b>PSS</b><br>V1 33, 15.3 ± 5.1<br>V2 33, 12 ± 5.8                       | CR       | 13.8 + 5.2  | 16 | 12.1 + 5.3  | 16 |
|                                                                          | CR + CPI | 16.6 + 4.8  | 17 | 12 + 6.4    | 17 |
| <b>Stress (Family Life)</b><br>V1 39, 45.7 ± 30.5<br>V2 36, 47.7 ± 27.8  | CR       | 40.9 + 31.5 | 20 | 45.2 + 28.3 | 19 |
|                                                                          | CR + CPI | 50.8 + 29.4 | 19 | 50.6 + 27.8 | 17 |
| <b>Stress (Work Life)</b><br>V1 38, 50 ± 35<br>V2 35, 50.3 ± 28.1        | CR       | 50.2 + 35.3 | 20 | 49.1 + 27.5 | 19 |
|                                                                          | CR + CPI | 49.7 + 35.6 | 18 | 51.6 + 29.4 | 17 |
| <b>Stress (Self-Oriented)</b><br>V1 39, 56 ± 24.6<br>V2 36, 47.3 ± 27.3  | CR       | 47.5 + 28   | 20 | 43.2 + 29.2 | 19 |
|                                                                          | CR + CPI | 64.9 + 16.9 | 19 | 51.9 + 25.2 | 17 |
| <b>GSI (BSI)</b><br>V1 43, 56.4 ± 10.3<br>V2 43, 46.8 ± 10.8             | CR       | 56.2 + 11.4 | 22 | 45 + 11.5   | 22 |
|                                                                          | CR + CPI | 56.7 + 9.1  | 21 | 48.8 + 9.8  | 21 |
| <b>Anxiety (BSI)</b><br>V1 43, 51.8 ± 7.9<br>V2 43, 49 ± 6               | CR       | 55.2 + 11.9 | 18 | 44.1 + 8.5  | 15 |
|                                                                          | CR + CPI | 55.5 + 8.9  | 19 | 49.5 + 8.9  | 17 |
| <b>Depression (BSI)</b><br>V1 43, 54.7 ± 9.3<br>V2 43, 48.4 ± 7.7        | CR       | 55 + 10.1   | 18 | 47.5 + 7.9  | 15 |
|                                                                          | CR + CPI | 54.3 + 8.7  | 19 | 49.3 + 7.5  | 17 |
| <b>Somatization (BSI)</b><br>V1 43, 56.1 ± 10.2<br>V2 43, 52 ± 10.5      | CR       | 54.4 + 10.5 | 18 | 58 + 9.7    | 15 |
|                                                                          | CR + CPI | 50.1 + 10.3 | 19 | 53.9 + 10.5 | 17 |
| <b>Paranoia (BSI)</b><br>V1 43, 54.4 ± 8.8<br>V2 43, 48.5 ± 7            | CR       | 55.1 + 8.9  | 18 | 47.5 + 6.8  | 15 |
|                                                                          | CR + CPI | 53.7 + 8.8  | 19 | 49.5 + 7.2  | 17 |
| <b>Psychoticism (BSI)</b><br>V1 43, 53.4 ± 7.4<br>V2 43, 48.4 ± 6        | CR       | 54 + 7.6    | 18 | 48 + 6.4    | 15 |
|                                                                          | CR + CPI | 52.7 + 7.3  | 19 | 48.8 + 5.8  | 17 |
| <b>Social Insecurity (BSI)</b><br>V1 43, 54.9 ± 9.5<br>V2 43, 47.4 ± 8.4 | CR       | 54.3 + 10.5 | 18 | 47.6 + 9.9  | 15 |
|                                                                          | CR + CPI | 55.5 + 8.6  | 19 | 47.2 + 6.7  | 17 |
| <b>Aggression (BSI)</b><br>V1 43, 52.6 ± 10.8<br>V2 43, 45.8 ± 8         | CR       | 53.5 + 12.6 | 18 | 44.5 + 7.2  | 15 |
|                                                                          | CR + CPI | 51.6 + 8.7  | 19 | 47.1 + 8.7  | 17 |
| <b>Compulsion (BSI)</b><br>V1 43, 55 ± 10.1<br>V2 43, 48.1 ± 11.8        | CR       | 55.5 + 9.6  | 18 | 48 + 12.8   | 15 |
|                                                                          | CR + CPI | 54.6 + 10.9 | 19 | 48.2 + 11   | 17 |
| <b>BODI 1</b><br>V1 37, 31.4 ± 18<br>V2 32, 27.4 ± 18.3                  | CR       | 35.6 + 17.9 | 18 | 29.4 + 16.4 | 15 |
|                                                                          | CR + CPI | 27.4 + 17.6 | 19 | 25.6 + 20.1 | 17 |
| <b>BODI 2</b><br>V1 37, 58.3 ± 31.3<br>V2 32, 57.5 ± 31.7                | CR       | 59.3 + 28.9 | 18 | 57 + 31.8   | 15 |
|                                                                          | CR + CPI | 57.3 + 34.2 | 19 | 57.8 + 32.5 | 17 |
| <b>BODI 3</b><br>V1 37, 34.8 ± 23<br>V2 32, 24.2 ± 17                    | CR       | 30.3 + 18   | 18 | 22.5 + 16.5 | 15 |
|                                                                          | CR + CPI | 39.2 + 26.6 | 19 | 25.7 + 17.7 | 17 |
| <b>BODI 4</b><br>V1 37, 45.2 ± 39.5<br>V2 32, 50 ± 37.4                  | CR       | 45.2 + 40.6 | 18 | 50.1 + 41.6 | 15 |
|                                                                          | CR + CPI | 45.2 + 39.5 | 19 | 49.9 + 34.5 | 17 |

| <b>Education Status</b><br>n (%)  | <b>Level</b>                     | <b>CR</b> | <b>CR + CPI</b> |
|-----------------------------------|----------------------------------|-----------|-----------------|
|                                   | Secondary, 1 <sup>st</sup> level | 2 (4.7)   | 0               |
|                                   | Secondary, 2 <sup>nd</sup> level | 2 (4.7)   | 3 (7)           |
|                                   | Post-Secondary (non-tertiary)    | 9 (20.9)  | 7 (16.3)        |
|                                   | Post-Secondary (university)      | 9 (20.9)  | 11 (25.6)       |
| <b>Occupation Status</b><br>n (%) | Self-Employed                    | 10 (23.3) | 8 (18.6)        |
|                                   | Employed                         | 7 (16.3)  | 6 (14)          |
|                                   | Unemployed/Training/Household    | 0         | 3 (7)           |
|                                   | Retired/Pensioned                | 5 (11.6)  | 4 (9.3)         |

**Supplementary Table S1.** Sample characteristics for all variables with means, standard deviations and number of data entries, respectively for visit 1 (V1, baseline) and visit 2 (V2, day 15). Characteristics are provided for the total sample as well as the two groups defined by either caloric restriction (CR) alone or with add-on clinical psychological intervention (CPI).
